# Supplementary figures and images for: Microliter ultrafast centrifuge platform for size-based particle and cell separation and extraction using novel omnidirectional spiral surface acoustic waves
Source: Royal Society of Chemistry journal article supplement (doi:10.1039/d0lc01012j), 2021-01-01

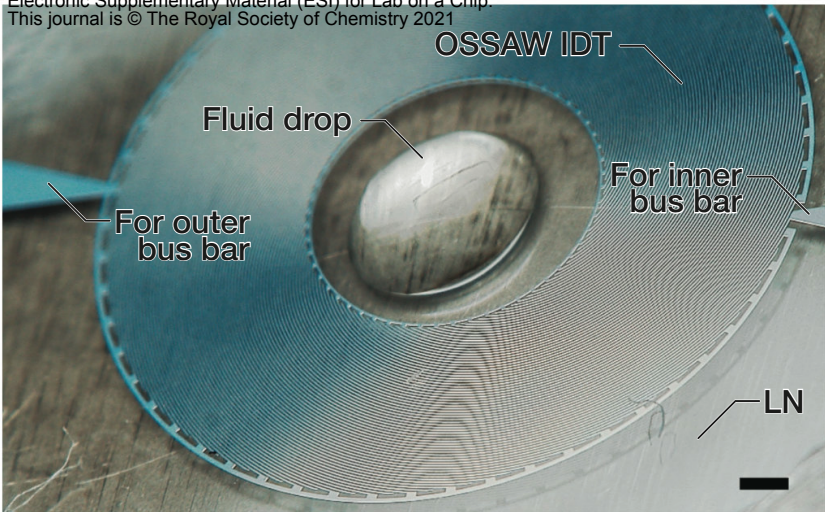

Supplement: d0lc01012j3.pdf [file d0lc01012j3.pdf]

FL16-A :: Alexa 700 CD41-A

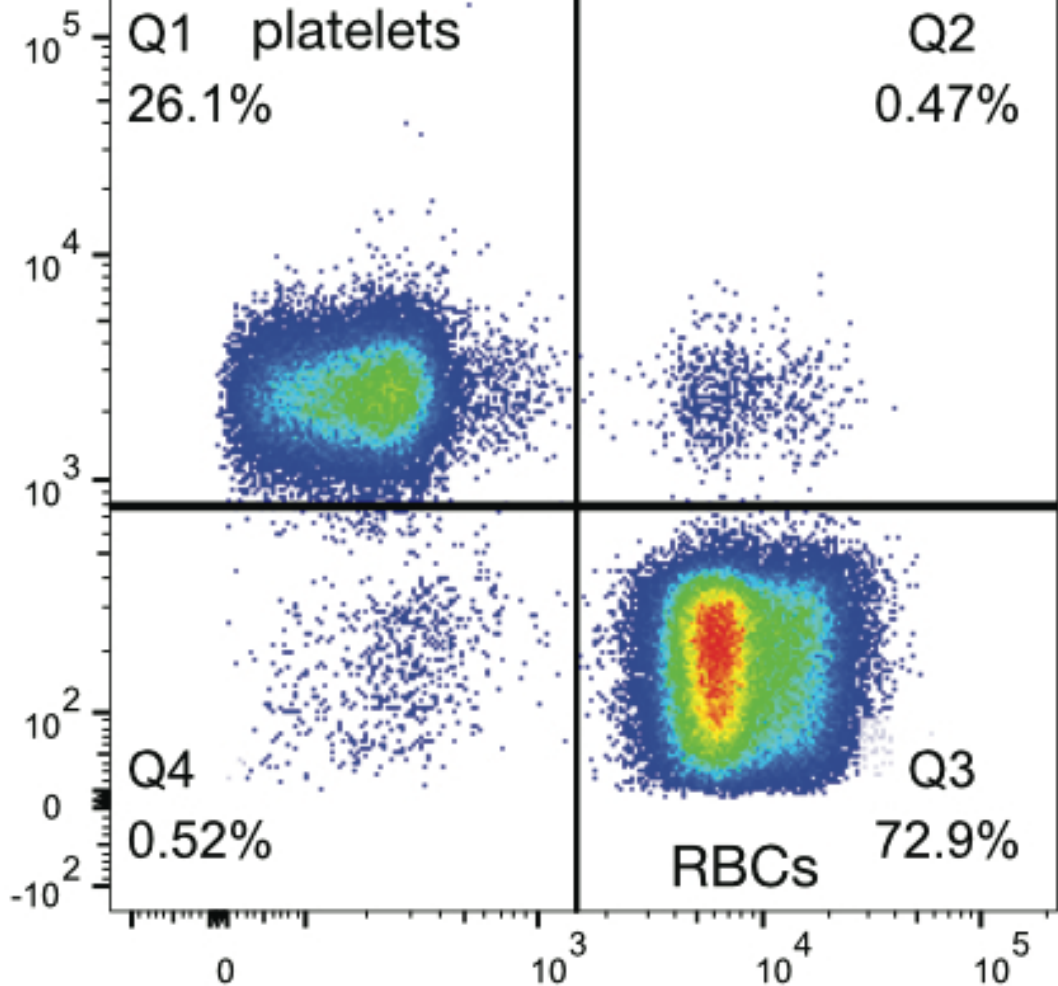

FL02-A :: Alexa 488 TER119-A

Supplement: d0lc01012j5.pdf [file d0lc01012j5.pdf]
